# Supplementary material
Source: Springer Nature journal article supplement (https://www.springermedizin.de/resource/supplementary/12889_2010_3380_MOESM3_ESM.pdf/9488922)
Supplement: MOESM3 [file 9488922]

**Table 3 - Goodness of fit of the logistic regression models for suicidal thoughts and suicide attempts.**

| Model                                       | suicidal thoughts     |      | suicide attempts      |      |
|---------------------------------------------|-----------------------|------|-----------------------|------|
|                                             | Pseudo-R <sup>2</sup> | BIC  | Pseudo-R <sup>2</sup> | BIC  |
| 1. gender only                              | .027                  | 4458 | .023                  | 2977 |
| 2. YSR scales only                          | .300                  | 3274 | .232                  | 2406 |
| 3. gender and YSR scales                    | .303                  | 3270 | .235                  | 2404 |
| 4. gender, YSR scales and their interaction | .305                  | 3329 | .236                  | 2470 |
